# Supplementary material for: Nonalcoholic Fatty Liver Disease Induced by High-Fat Diet in C57bl/6 Models
Source: MDPI journal article supplement (doi:10.3390/nu11123067), 2019-12-16
Supplement: s1 [file s1]

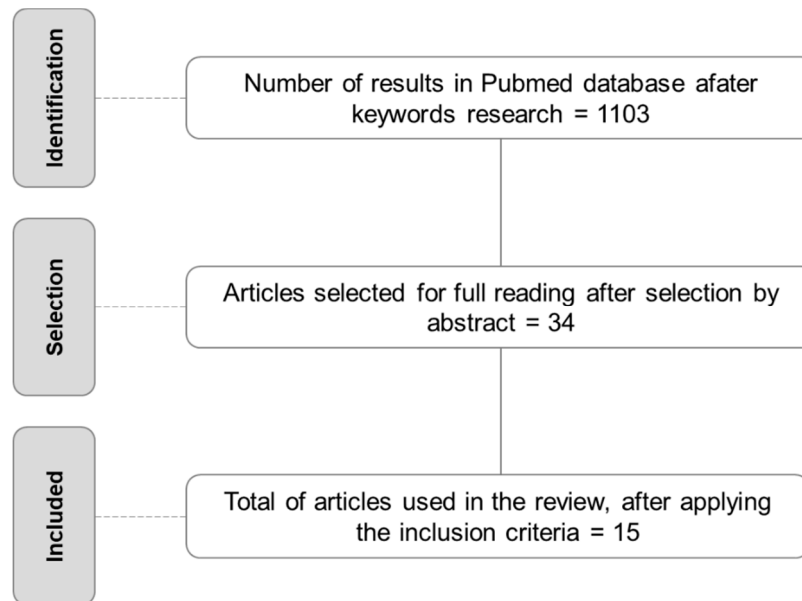

**Supplementary Figure 1.** Flowchart of the methodology used to choose the articles that comprised this review
